# Supplementary material
Source: publisher figshare collection journal article supplement (https://tandf.figshare.com/ndownloader/files/37564627)
Supplement: Supplementary file 1 [file 37564627]

## Appendix A

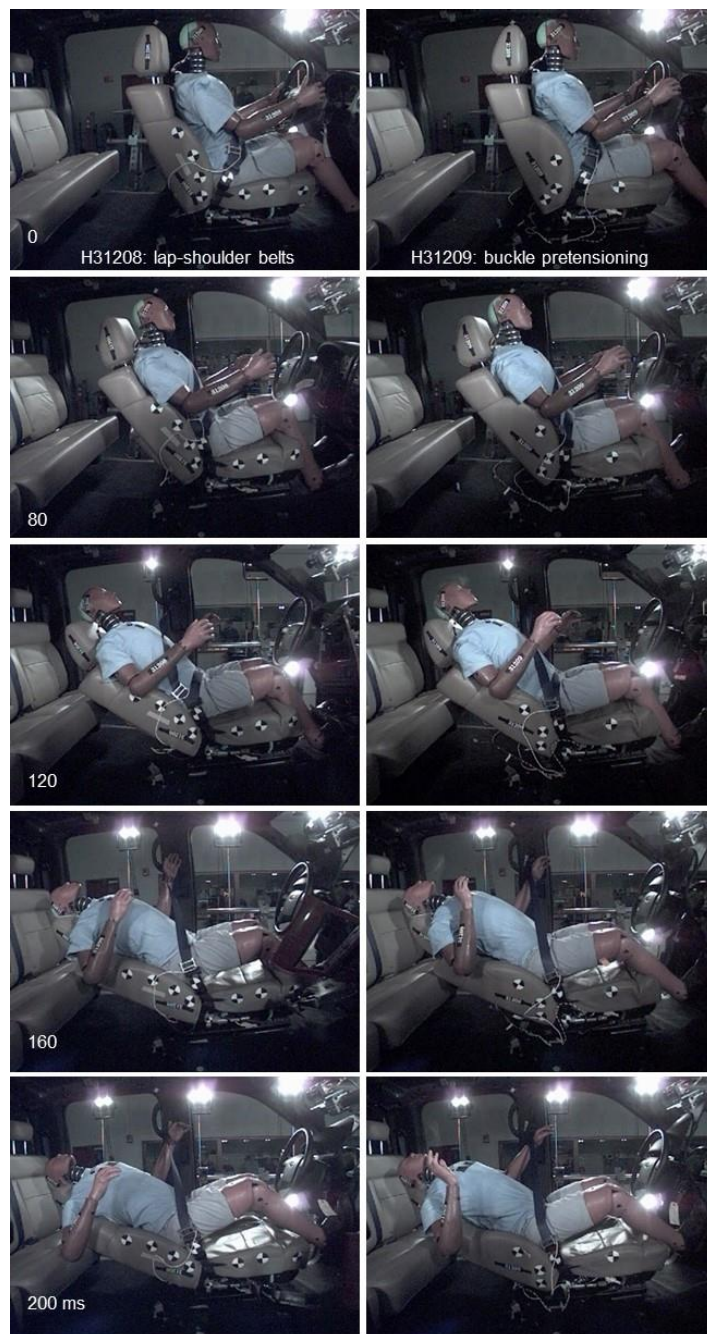

Figure A1: Occupant kinematics with and without buckle pretensioning in 40.2 km/h (25 mph) rear sled tests.

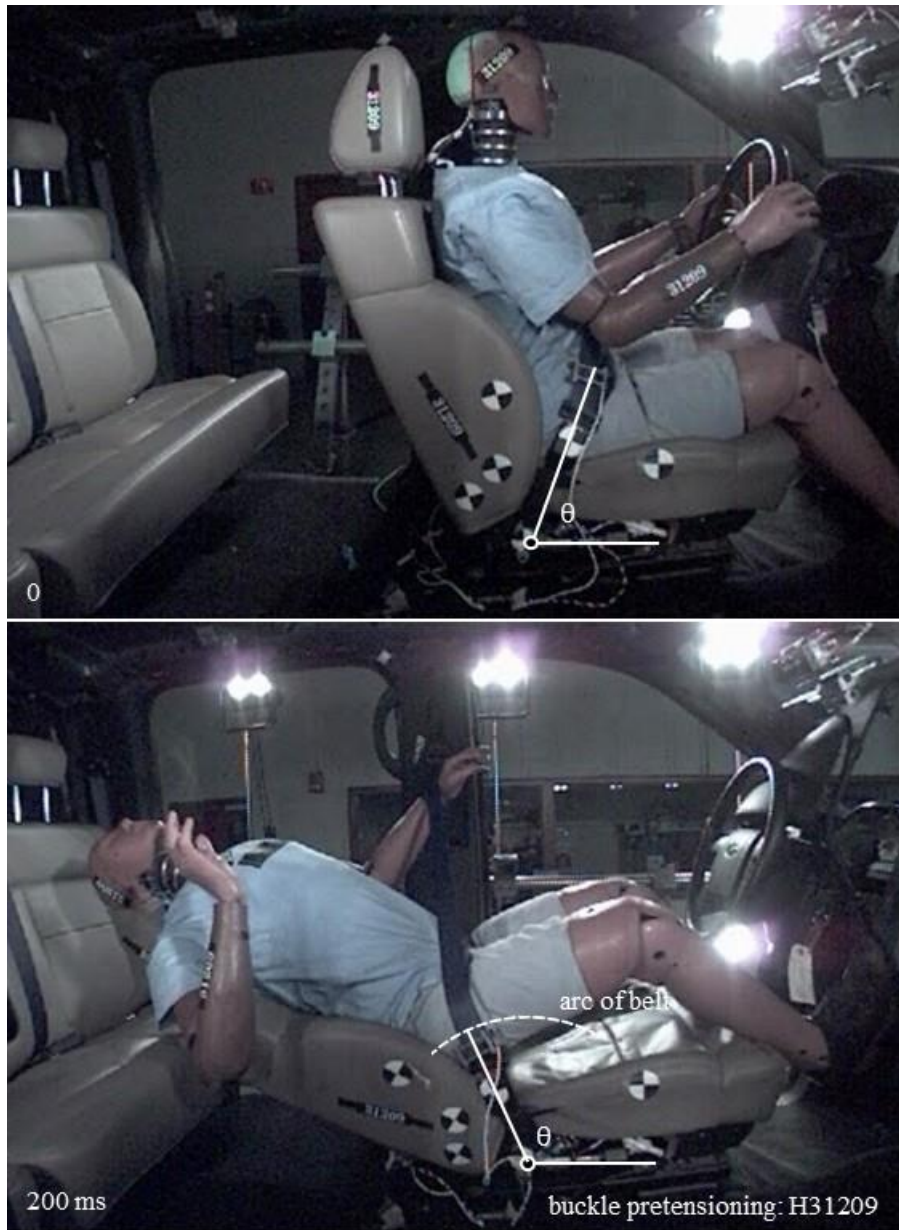

Figure A2: Kinematics at 0 and 200 ms in test H31209 with buckle pretensioning.

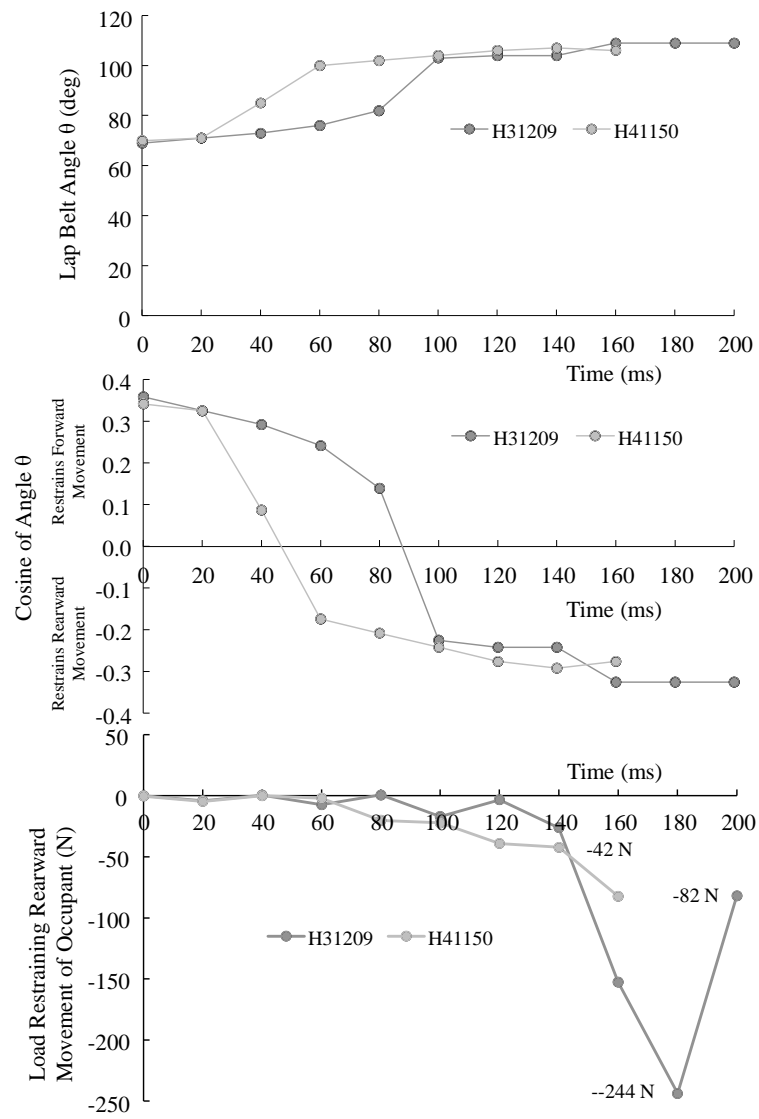

Figure A3: Lap belt angle, cosine of the angle and lap-belt load in the horizontal direction in H31209 and H41150.

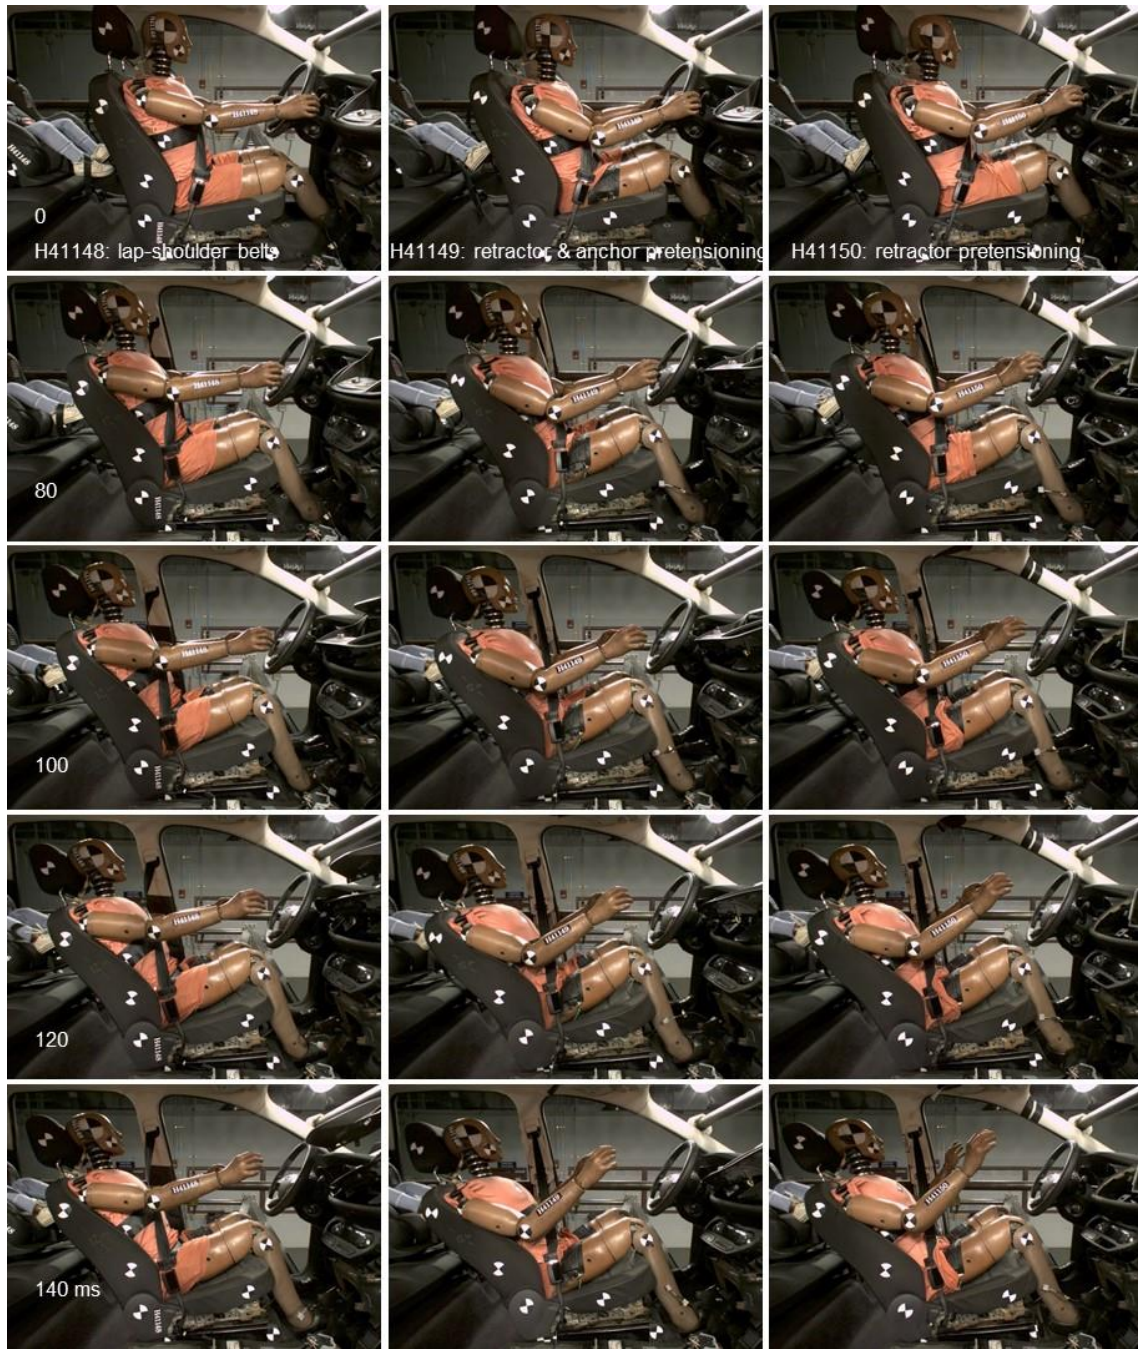

Figure A4: Occupant kinematics in matched tests with and without retractor and retractor and anchor pretensioning in 40.2 km/h (25 mph) rear sled tests.

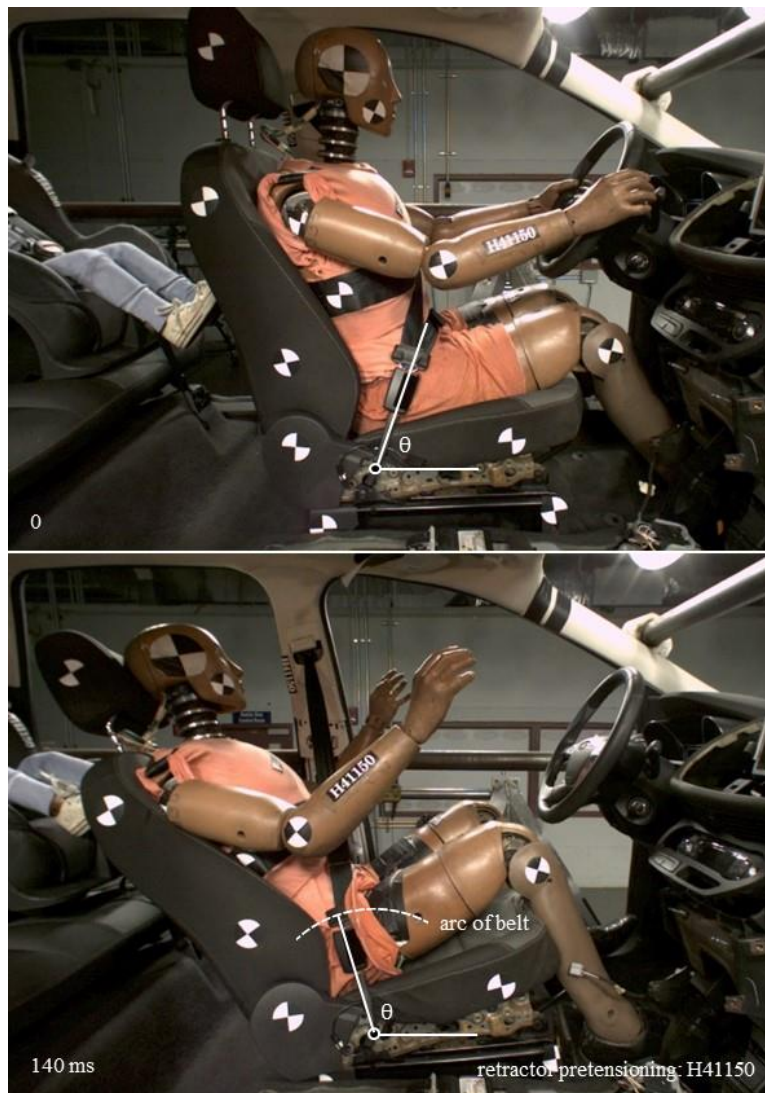

Figure A5: Kinematics at 0 and 150 ms in test H41150 with retractor pretensioning.
